# Supplementary material
Source: Springer Nature journal article supplement (https://www.springermedizin.de/resource/supplementary/13075_2011_3074_MOESM2_ESM.pdf/9693658)

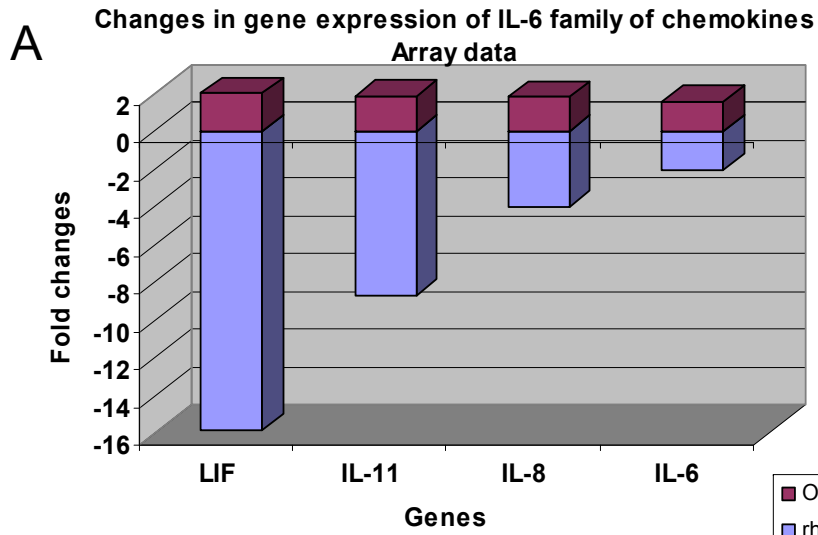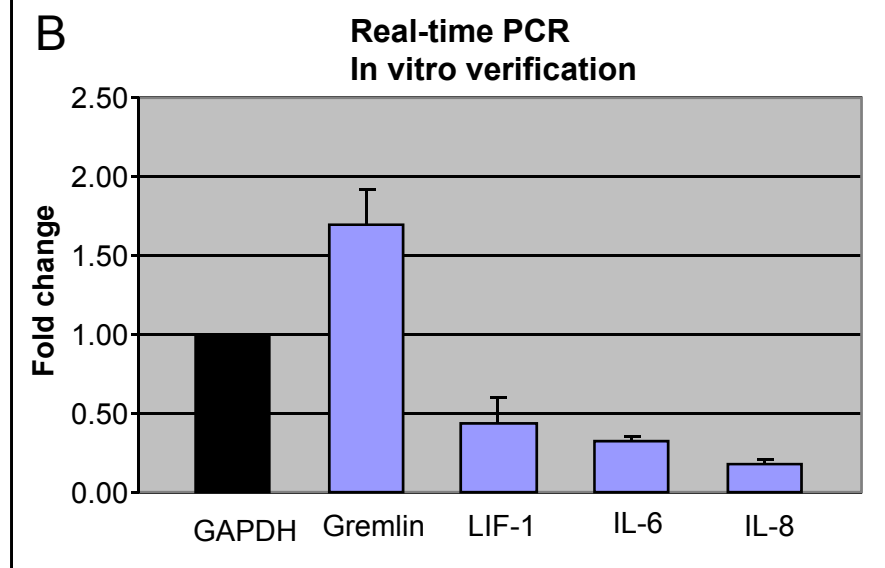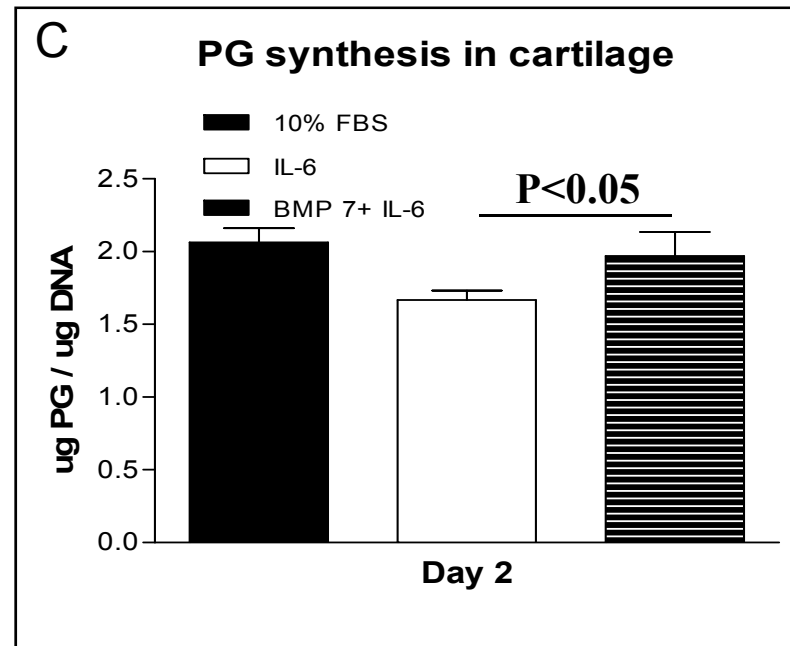

Supplement: MOESM2 [file 9693658]
